# Supplementary material for: The Relative Importance of Shear Forces and Surface Hydrophobicity on Biofilm Formation by Coccoid Cyanobacteria
Source: PubMed Central journal article supplement (PMC7183090; doi:10.3390/polym12030653), 2020-03-12
Supplement: polymers-12-00653-s001.pdf [file polymers-12-00653-s001.pdf]

## Supplementary Material

### S1 - Composition of the polymeric epoxy resin

The HB Eposurf 2 resin is composed by bisphenol-A- (epichlorohydrin) and epoxy resins (average molecular weight below 700 KDa), Poly (Bisphenol A-co-epichlorohydrin), 4-4'-Isopropylidenediphenol, oligomeric reaction products with 1-chloro-2,3-epoxypropene, phenol, polymer with formaldehyde, oxiranylmethyl ether Poly[(phenyl glycidyl ether)-co-formaldehyde] and 1,6-Hexamethylenediol diglycidyl ether. The HB Eposurf hardener is composed by 3-aminomethyl-3,5,5-trimethylcyclohexylamine, 5-Amino-1,3,3-trimethylcyclohexanemethylamine, mixture of cis and trans, 5-Amino-1,3,3-trimethylcyclohexanemethylamine, mixture of cis and trans, 3-aminomethyl-3,5,5-trimethylcyclohexylamine.

**Figure S1 – A representative image of water contact angle measurement.** Pictures of water droplets on glass (left) and epoxy-coated glass (right) surfaces.

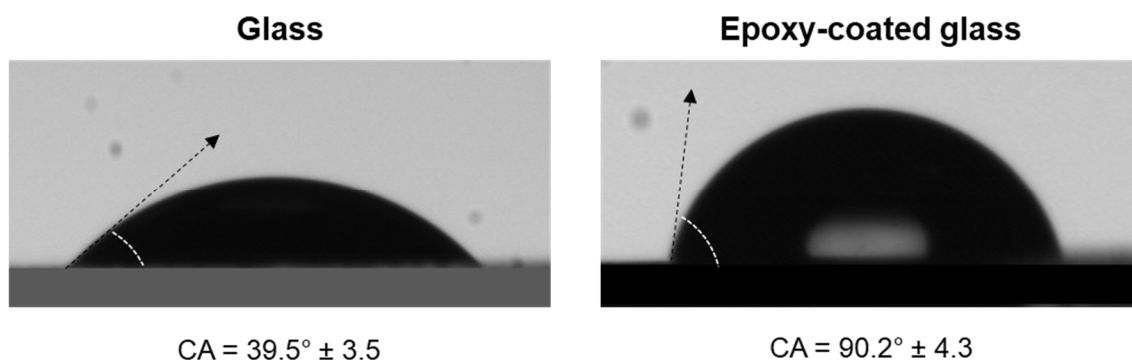

1 Table S1 – *p*-values obtained for the differences between the hydrodynamic conditions (40 vs 185 rpm) on biofilm formation (*p*-values < 0.05 are shown in  
 2 bold)

|                              | <i>S. salina</i> 00041 |                    | <i>Cyanobium</i> sp. 06097 |                    |
|------------------------------|------------------------|--------------------|----------------------------|--------------------|
|                              | Glass                  | Epoxy-coated glass | Glass                      | Epoxy-coated glass |
| Biofilm cells                | 0.091                  | 0.275              | 0.282                      | <b>0.048</b>       |
| Biofilm wet weight           | 0.083                  | 0.685              | 0.698                      | 0.933              |
| Biofilm thickness            | <b>0.018</b>           | <b>&lt; 0.001</b>  | <b>0.001</b>               | <b>0.035</b>       |
| Chlorophyll <i>a</i> content | <b>&lt; 0.001</b>      | <b>&lt; 0.001</b>  | 0.303                      | 0.751              |

3  
 4 Table S2 – *p*-values obtained for the differences between surface hydrophobicity (glass vs epoxy-coated glass) on biofilm formation (*p*-values <0.05 are  
 5 shown in bold)

|                              | <i>S. salina</i> 00041 |                   | <i>Cyanobium</i> sp. 06097 |              |
|------------------------------|------------------------|-------------------|----------------------------|--------------|
|                              | Lower shear            | Higher shear      | Lower shear                | Higher shear |
| Biofilm cells                | 0.161                  | 0.589             | <b>0.008</b>               | 0.137        |
| Biofilm wet weight           | 0.632                  | <b>0.018</b>      | <b>0.003</b>               | <b>0.007</b> |
| Biofilm thickness            | 0.053                  | <b>&lt; 0.001</b> | <b>0.001</b>               | 0.202        |
| Chlorophyll <i>a</i> content | 0.726                  | 0.208             | 0.079                      | 0.160        |

6  
 7  
 8
